# Supplementary material for: Establishing and Validating an Aging-Related Prognostic Signature in Osteosarcoma
Source: Hindawi journal article supplement (doi:10.1155/2023/6245160), 2023-02-23

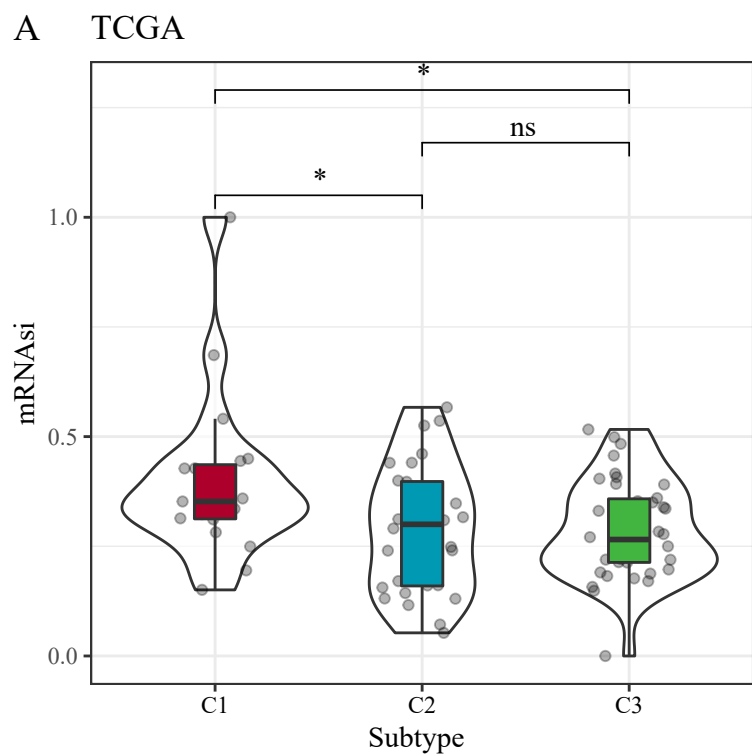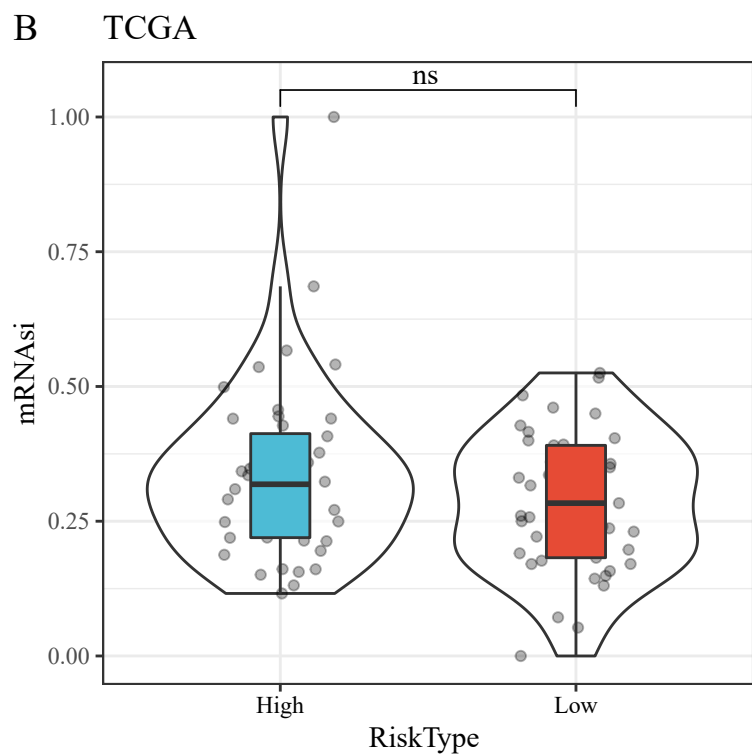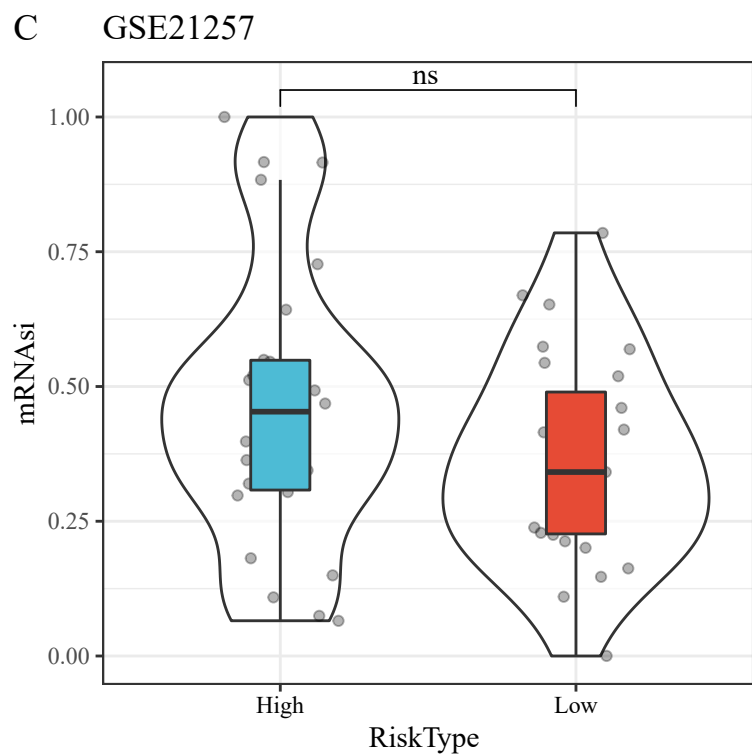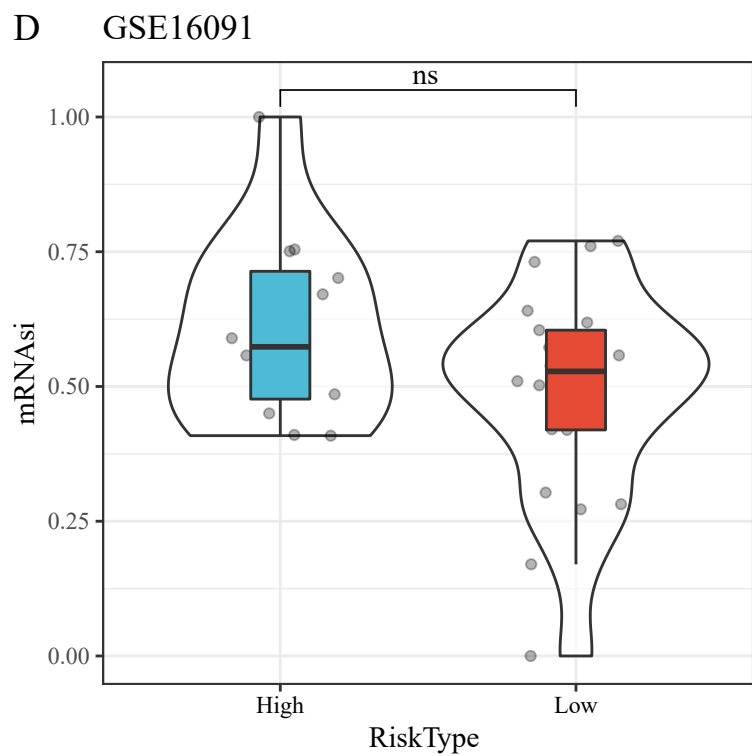

Supplement: f2 [file 6245160.f2.pdf]
